# Supplementary material
Source: publisher figshare collection journal article supplement (https://sage.figshare.com/ndownloader/files/14812940)
Supplement: Supplementary file 1 [file 14812940]

## **Appendix B.**

### **Cleft Lip and Palate Surgery**

*Your completion of this survey or questionnaire will serve as your consent to be in this research study*

#### **Part 1. Cleft Lip and Palate Surgery**

1) Which of the following is true regarding clefts?

- a) It is a birth disorder where the back of the nasal passage is blocked.
- b) It is the separation of the upper lip and/or the roof of the mouth.
- c) It is a problem with vision.
- d) It is a problem with early closure of the bones of the skull.

2) Cleft lip and cleft palate are among the most common birth anomalies affecting children in North America and worldwide.

- a) True
- b) False

3) All of the following specialists is needed to evaluate and manage cleft lip and/or cleft palate except

- a) Plastic surgeon
- b) Pediatrician
- c) Pediatric dentist
- d) Allergist
- e) Otolaryngologist (ear, nose and throat specialist)

4) Cleft lip repairs are typically performed between 2 and 6 months of age and cleft palate repairs are generally performed after cleft lip repair when the child is between 9 to 18 months of age.

- a) True
- b) False

5) Babies with cleft palate may need specialized bottles, or feeding tubes to help eat well.

- a) True
- b) False

6) Do you feel like you understand Cleft Lip and Palate Surgery after reading this passage? Yes/No

## **Part 2. Demographics**

1) Age: \_\_\_\_\_

2) Gender:

- a) Male
- b) Female

3) What is the highest level of education you completed?

- a) Did not complete high school. Please specify the highest grade level completed: \_\_\_\_\_
- b) High School/GED
- c) Some College
- d) Bachelor's Degree
- e) Master's Degree
- f) Advanced Graduate work or Ph.D.

4) Ethnicity:

- a) White
- b) Hispanic or Latino
- c) Black or African American
- d) Native American or American Indian
- e) Asian/Pacific Islander
- f) Other

5) What would you say is your household annual income?

- a) Under \$25,000
- b) \$25,000 - \$39,999
- c) \$40,000 - \$49,999
- d) \$50,000 - \$74,999
- e) \$75,000 - \$99,999
- f) Over \$100,000
